## **Concurrent invasions by European starlings (*Sturnus vulgaris*) suggest selection on shared genomic regions even after genetic bottlenecks**

Natalie R. Hofmeister<sup>1,2\*</sup>, Katarina Stuart<sup>3</sup>, Wesley C. Warren<sup>4</sup>, Scott J. Werner<sup>5</sup>,  
Melissa Bateson<sup>6</sup>, Gregory F. Ball<sup>7</sup>, Katherine L. Buchanan<sup>8</sup>, David W. Burt<sup>9</sup>, Adam  
P.A. Cardilini<sup>10</sup>, Phillip Cassey<sup>11</sup>, Tim De Meyer<sup>12</sup>, Julia George<sup>13</sup>, Simone L. Meddle<sup>14</sup>,  
Hannah M. Rowland<sup>15,16</sup>, Craig D.H. Sherman<sup>10</sup>, William Sherwin<sup>3</sup>, Wim Vanden  
Berghe<sup>17</sup>, Lee Ann Rollins<sup>3+</sup>, David F. Clayton<sup>13+</sup>.

<sup>1</sup> Department of Ecology and Evolutionary Biology, Cornell University, Ithaca, NY, USA  
14850

<sup>2</sup> Fuller Evolutionary Biology Program, Cornell Lab of Ornithology, Ithaca, NY, USA  
14850

<sup>3</sup> Evolution & Ecology Research Centre, School of Biological, Earth and Environmental  
Sciences, UNSW Sydney, Sydney, New South Wales, Australia

<sup>4</sup> Department of Animal Sciences and Surgery, Institute for Data Science and  
Informatics, University of Missouri, MO, USA

<sup>5</sup> United States Department of Agriculture, Animal and Plant Health Inspection Service,  
Wildlife Services, National Wildlife Research Center, Fort Collins, CO, USA 80521

<sup>6</sup> Biosciences Institute, Newcastle University, Framlington Place, Newcastle upon Tyne,  
NE2 4HH, United Kingdom

<sup>7</sup> Department of Psychology, University of Maryland, College Park MD 20742 USA

<sup>8</sup> Centre for Integrative Ecology, Deakin University, Geelong, VIC 3216, Australia

<sup>9</sup> Office of the Deputy Vice-Chancellor (Research and Innovation), The University of Queensland, Brisbane, Australia

<sup>10</sup> School of Life and Environmental Sciences, Deakin University, Waurin Ponds, VIC, Australia

<sup>11</sup> Invasion Science & Wildlife Ecology Lab, University of Adelaide, Adelaide SA 5005, Australia

<sup>12</sup> Department of Data Analysis and Mathematical Modelling, Ghent University, Ghent B9000, Belgium

<sup>13</sup> Clemson University, Department of Genetics & Biochemistry, South Carolina, USA 29634

<sup>14</sup> The Roslin Institute, The Royal (Dick) School of Veterinary Studies, The University of Edinburgh, Midlothian, EH25 9RG, UK

<sup>15</sup> Max Planck Institute for Chemical Ecology, Hans Knöll Straße 8, Jena, 07745, Germany

<sup>16</sup> Department of Zoology, University of Cambridge, Downing Street, Cambridge, CB2 3EJ

<sup>17</sup> Department of Biomedical Sciences, University Antwerp, Antwerp B9000 Belgium

<sup>†</sup>joint last authors

\* corresponding author: [nrh44@cornell.edu](mailto:nrh44@cornell.edu)

## Abstract

A species' success during the invasion of new areas hinges on an interplay between demographic processes and the outcome of localized selection. Invasive European Starlings (*Sturnus vulgaris*) established populations in Australia and North America in the 19<sup>th</sup> century. Here, we compare whole-genome sequences among native and independently introduced European Starling populations from three continents to determine how demographic processes interact with rapid adaptive evolution to generate similar genetic patterns in these recent and replicated invasions. Our results confirm that a post-bottleneck expansion may in fact support local adaptation. We find that specific genomic regions have differentiated even on this short evolutionary timescale, and suggest that selection best explains differentiation in at least two of these regions. This infamous and highly mobile invader adapted to novel selection (e.g., extrinsic factors), perhaps in part due to the demographic boom intrinsic to many invasions.

## 1 Introduction

2           Some species can establish and spread in a novel environment more  
3 successfully than others, and defining what makes a species 'invasive' is hotly  
4 contested<sup>1-4</sup>. Invasion biologists continue to debate whether an invasion's success can  
5 be better attributed to an intrinsic property of the founding population or to extrinsic  
6 conditions experienced by the population. When invasive populations colonize a new  
7 environment, they often undergo genetic bottlenecks<sup>5</sup>. However, even populations with  
8 limited genetic diversity, including those subject to founder effects, can adapt quickly to  
9 novel environments<sup>6-8</sup>. For example, gene surfing during range expansion has led to  
10 adaptation in experiments in microbes<sup>9</sup> and wild, invasive bank voles<sup>10</sup>. Simultaneous  
11 with demographic shifts, invasive populations may encounter environmental conditions  
12 that exert novel selective regimes. Although genetic bottlenecks often limit the genetic  
13 variation available to selection, local adaptation can occur even after a genetic  
14 bottleneck<sup>6,11-13</sup>.

15           Recent and replicated invasions are particularly useful for exploring the eco-  
16 evolutionary dynamics of population expansion<sup>14-16</sup>, since any divergence after  
17 introduction likely reflects a combination of demographic and/or selective forces. One  
18 such recent invader is the Common or European Starling (*Sturnus vulgaris*), which was  
19 introduced across south-eastern Australia in 1856 and to New York, United States of  
20 America in 1890<sup>17</sup>. Both the American and Australian invasions were most likely  
21 founded by individuals from the United Kingdom<sup>18,19</sup>, although multiple introductions in  
22 Australia might contribute to ongoing gene flow among continents.<sup>20</sup>

23           The starling's ecology is well-studied in both invasions, enabling us to explore  
24   how environmental factors might impact genetic variation<sup>21</sup>. Native-range starlings thrive  
25   in open pastures and urban environments, but starlings' ecology and life history vary  
26   among populations. In range-wide studies of Australian<sup>22-24</sup> and North American<sup>25,26</sup>  
27   invasions, temperature and precipitation influence genetic differentiation, even after  
28   controlling for population structure. Migration and dispersal also vary among invasions.  
29   In North America, starlings can migrate long distances each season<sup>19,27</sup>, but populations  
30   in the Western USA likely disperse and/or migrate shorter distances<sup>28</sup>. In contrast,  
31   starlings in Australia exhibit strong population structure and likely migrate short  
32   distances in search of food, even though environmental conditions are much more arid  
33   than in the native range<sup>22</sup>. Finally, variation in the breeding cycle may also facilitate  
34   invasion success as invasive populations tend to lay more than one clutch, whereas the  
35   UK population generally lays only one clutch<sup>29,30</sup>.

36           We use concurrent starling invasions in Australia (AU) and North America (NA) to  
37   examine the evolutionary and genetic consequences of invasion. Both starling invasions  
38   rapidly expand from small founding populations in the late 19<sup>th</sup> century<sup>18,19</sup>. Given this  
39   natural control, we take advantage of a rare opportunity to compare intrinsic and  
40   extrinsic drivers of invasion success. Founder effects and other intrinsic demographic  
41   properties of invasions certainly influence establishment<sup>31,32</sup>, and we predict some  
42   divergence from the native, ancestral population (represented by UK samples here) due  
43   to genetic drift. We combine demographic models with fine-scale measures of genomic  
44   diversity and differentiation to determine whether drift alone can explain observed  
45   genetic variation, and we find strong evidence that extrinsic factors such as novel

46 selective pressures generate differentiation in both invasions specific to only a few  
47 genomic regions.

48

## 49 **Results**

### 50 **Differentiation and population structure**

51 We sequenced whole genomes of eight native-range individuals from Northumberland,  
52 UK and eight from each of the two invasions (NA: all 8 from New York City, USA; AU: 2  
53 each from four locations in New South Wales, Australia, Table S1). After filtering, we  
54 obtained more than 11 million SNPs with minimum 5X coverage (average genome-wide  
55 coverage = 18.44, for details on how choice of reference genome impacts variant-  
56 calling, see SI Section 1). All patterns identified using a variant-called dataset concur  
57 with those based on genotype likelihood (ANGSD); for details on how variant-calling  
58 impacts patterns, see SI Section 2. We use a variant set filtered for minor allele  
59 frequency, Hardy-Weinberg Equilibrium, and linkage disequilibrium for analyses of  
60 population structure, but for more accurate estimates of genetic diversity and  
61 differentiation, we report results from a genome scan of variants filtered only for quality  
62 and depth. Differentiation of the two invasive populations from the native population is  
63 low, which is expected given that these populations split less than two centuries ago.  
64 However, differentiation between AU and UK ( $F_{ST}$  AU vs. UK = 0.016) is almost twice  
65 that between NA and UK ( $F_{ST}$  NA vs. UK = 0.008). We examined this contrast in genetic  
66 differentiation using analyses of population structure.

67 All three populations are readily distinguished from one another by a principal  
68 component analysis of 40,488 unlinked SNPs (minor AF > 0.25): PC1 (6.3% of genetic

69 variation) separates the UK and NA populations from the Australian population (Figure  
70 1A). This evidence complements previous work that showed extensive population  
71 structuring in Australia but nearly continuous gene flow across North America, based on  
72 reduced-representation genomic data<sup>22,33</sup>. Principal component analysis in the genotype  
73 likelihood framework of ANGSD<sup>34</sup> shows nearly identical results (Figure S6).  
74 Furthermore, individuals are reliably assigned to clades based on pairwise genetic  
75 distances calculated in ANGSD (Figure 1B).

76 We note that the tight clustering of UK individuals in Figure 1A contrasts with the  
77 large distances between these same individuals in Figure 1B. In the genotype likelihood  
78 dataset, genetic distances between native UK individuals are much greater than  
79 distances among individuals within each invasive population (Figure 1B). Because  
80 these two datasets differ in variant-calling and filtering strategies, the genetic distance  
81 among UK individuals in Figure 1B may reflect rare alleles that were filtered out of the  
82 variant set in Figure 1A. However, PCs 3 and 4 in the PCA of the variant-called dataset  
83 do indicate additional structure within the UK population (Figure S7).

84

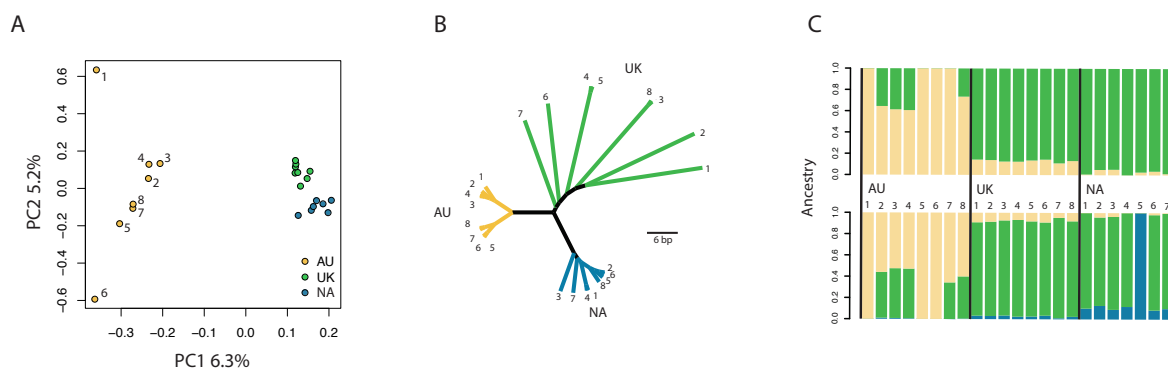

85

86 Figure 1. A) Principal components of 40,488 unlinked SNPs explain 6.3% (PC1) and  
87 5.2% (PC2) of genetic variation. B) cladogram of genetic distances among samples  
88 based on genotype likelihoods of 16,151,007 sites. C) ADMIXTURE analyses showing  
89 K=2 (top) and K=3 (bottom row).

90

91 Admixture analyses revealed statistical support for a two-population model,  
92 which distinguished AU from NA+UK and was only slightly weaker (cross-validation  
93 error = 0.88) than the best-supported model of K=1 (cross-validation error = 0.73, Figure  
94 1C, SI Section 3). Regardless of the number of populations hypothesized in models of  
95 admixture, the NA invasion consistently shares a higher proportion of its ancestry with  
96 the UK population. Individuals from the Australian population are distinguished from the  
97 other two populations in all tested values of K. Considered in concert, these tests of  
98 population structure show that Australian and North American populations differ in the  
99 amount of divergence from the native UK population. Founder effects likely contribute to  
100 the observed population structure, and below we describe explicit models of  
101 demographic processes.

102

### 103 **Invasive and native populations experienced bottlenecks and subsequent** 104 **expansion**

105 To address the impact of demographic processes in generating the observed  
106 patterns we used the site-frequency spectrum built from genotype likelihoods to  
107 construct models of changes in the effective population size over time. We examined  
108 the demographic history of all three populations using fastsimcoal2<sup>35</sup>. The demographic



109 model shows that both invasions experienced a bottleneck upon introduction (Figure 2),  
110 which is exactly what we expect given the small number of founding individuals in both  
111 AU and NA. Bottlenecks often lead to inbreeding within a population, and we find that  
112 inbreeding is negligible but slightly higher in the Australian population than in the NA  
113 population (Table S2). In addition, relatedness among individuals is quite low, where  
114 zero indicates no shared alleles among individuals (maximum AJK statistic = 0.06).  
115 Each invasion appears to have recovered quickly by expanding in effective population  
116 size, and at present, our data suggest similar effective population sizes in both the AU  
117 and NA invasions. Much of the ancestral variation appears to be shared among  
118 invasions, given that the genome-wide average  $F_{ST}$  between AU and NA is 0.04,  
119 although we note that genetic differentiation among invasions confirms the expectation  
120 that different variants will make it through each genetic bottleneck. The results  
121 presented here concur with range-wide sampling that indicates genetic bottlenecks  
122 followed by rapid expansion with little evidence of inbreeding in both Australia<sup>22</sup> and  
123 North America<sup>33</sup>.  
124

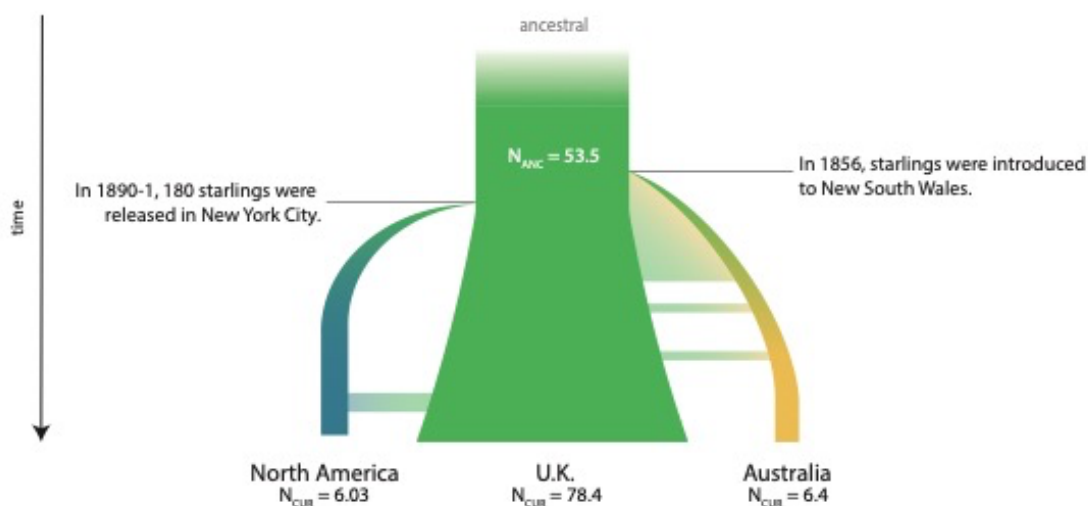

125

126 Figure 2. Demographic model of effective population size based on the site-frequency  
127 spectrum. Schematic approximates population growth based on model output from  
128 *fastsimcoal2*.

129

130 Population bottlenecks often lead to a loss of genetic diversity when genetic drift  
131 drives to fixation alleles once maintained at a moderate frequency. Since both the AU  
132 and NA invasions experienced a genetic bottleneck, we expect that nucleotide diversity  
133 ( $\pi$ ) within each population should be higher in the older and larger native range  
134 population than in each invasive range. However, we find that 70% of 50-kb windows  
135 show greater nucleotide diversity in AU (compared to UK diversity), and 74% show  
136 greater diversity in NA. The filters applied should not lead to disproportional allelic  
137 dropout of rare alleles, because we did not filter for minor allele frequency prior to this  
138 scan. Higher invasive diversity may be a sampling artifact: rare variants in the native  
139 range may have 'surfing' to a higher frequency in the invasions, and our sampling of the  
140 native range (in Northumberland, UK) likely represents only a small portion of genetic

141 variants that could have been introduced in AU and NA. We also note that the UK  
142 individuals sampled here do not capture range-wide diversity in the native population,  
143 and therefore we expect that actual nucleotide diversity in the UK population is higher  
144 than what we have sampled here. Additional investigation of native range starlings will  
145 be needed to determine whether lower diversity in the UK is recovered with broader  
146 geographic sampling.

147 Our demographic models show that both the AU and NA invasions rapidly  
148 expanded in population size after the initial bottleneck, which predicts that many loci  
149 would be lost upon establishment of the invasive populations even as variants in other  
150 loci increase in frequency. If gene surfing facilitated by rapid population expansion  
151 explained genome-wide differentiation, then we would expect to find that regions where  
152 invasive diversity is higher than diversity in the native range are distributed across many  
153 chromosomes. However, shifts in diversity and differentiation that occur only in a few  
154 narrow regions of the genome would suggest evolutionary dynamics specific to that  
155 region. If regions that have differentiated (e.g., high  $F_{ST}$ ) from the native range also  
156 show higher diversity in the invasions, this may suggest either a relaxation of purifying  
157 selection or an increase in diversifying selection at specific regions of the genome. We  
158 note here that the recombination landscape may also contribute to these patterns, and  
159 discuss this factor in the following section.

160

### 161 **Differentiation of a few genomic regions reveal consequences of invasion**

162 Starling populations colonized their invaded ranges less than two centuries ago, and the  
163 age of these populations makes it somewhat surprising to find loci specific to the

164 derived populations with fixation indices as high as 0.57 in a single 10-kb window  
165 (Figure 3). However, no putative outlier windows approach fixation in any comparison  
166 across all individuals in a population. We consider only the top 0.1% of 50-kb windows  
167 to be  $F_{ST}$  outliers (AU vs. UK:  $F_{ST} > 0.30$ ; NA vs. UK:  $F_{ST} > 0.22$ ); subsequent  
168 references to outliers indicate these windows. Outliers include Chromosomes 1, 2 and  
169 6, and to a lesser extent, 1A, 4, and 4A. Examining localized shifts in diversity and  
170 differentiation at these regions can help to resolve the relative contributions of  
171 demography and selection.

172         Genome scans like this one tend to search for genomic islands of divergence,  
173 where recombination can explain divergence among populations<sup>36</sup>. High levels of  
174 differentiation paired with a reduction in diversity may stem from suppressed  
175 recombination (e.g., proximity to the centromere or a structural rearrangement), or from  
176 alleles approaching fixation or loss due to drift or selection (e.g., a selective sweep). We  
177 find that most putative outlier regions are distant from the centromere location  
178 (predicted via homology with the zebra finch (*Taeniopygia guttata*) genome,  
179 Supplementary Information). Nevertheless, genomic architecture—including linkage  
180 disequilibrium independent of the centromere—plays a role in how differentiation among  
181 populations is generated. Below, we discuss how demography and selection drive  
182 divergence in invasions, considering the context of the starling's genomic architecture.  
183

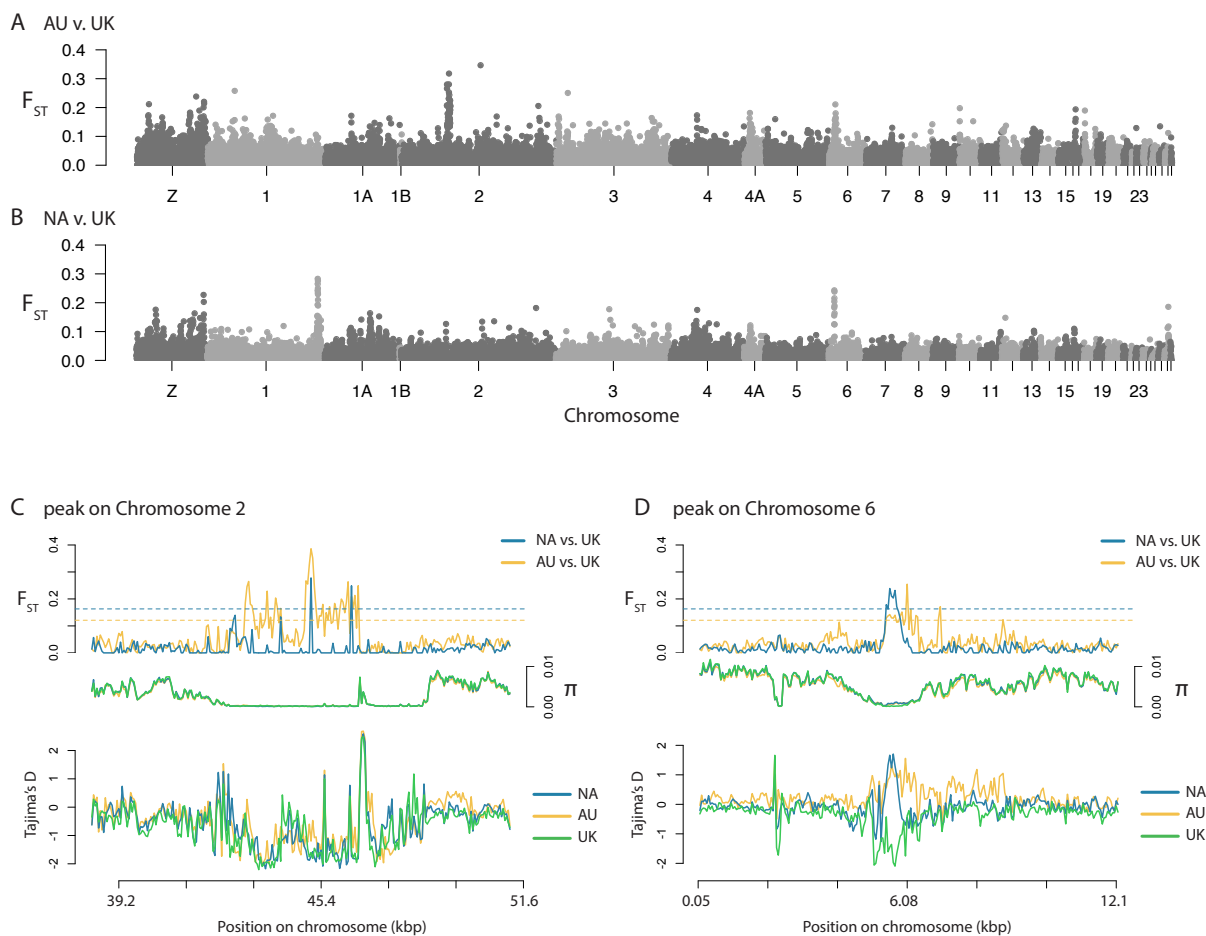

184

185 Figure 3. A-B) Manhattan plots show 50-kb windowed  $F_{ST}$  between AU & UK (A) and  
186 NA & UK (B) populations. C-D) 50-kb windowed  $F_{ST}$  (top row),  $\pi$  within each population  
187 (middle), and Tajima's  $D$  within each population (bottom row), centered on the elevated  
188  $F_{ST}$  regions of Chromosome 2 (C) and Chromosome 6 (D). Color represents each  
189 population, except in  $F_{ST}$  plot where yellow indicates  $F_{ST}$  AU vs. UK and blue indicates  
190  $F_{ST}$  NA vs. UK.

191

192

193

194 **Some  $F_{ST}$  outlier regions show clear signals of selection in one or both invasions**

195       If directional selection were driving differentiation between an invading population  
196 and its native ancestral population, we would expect to see a decline in nucleotide  
197 diversity specific to the invading population. But, as described above, local reductions in  
198  $\pi$  could also result from population bottlenecks experienced during founder events; to  
199 clarify the impact of selection, we look Tajima's  $D$ . We infer directional selection where  
200 most variants are either very rare or very common (e.g., negative Tajima's  $D$ ). We  
201 examine these predictions by looking at two  $F_{ST}$  peaks on Chromosome 1A; in this  
202 region, we find very low nucleotide diversity and negative Tajima's  $D$  in both AU and  
203 NA, which is exactly the signature we would expect under purifying selection (Figure  
204 S12). Around that region, Tajima's  $D$  in the UK population varies between 0 and 1. We  
205 note that genetic distance ( $d_{xy}$ ) could also clarify mechanisms, but as  $d_{xy}$  tracks  $F_{ST}$   
206 perfectly, we argue that linked selection offers the clearest explanation. This pattern is  
207 echoed on Chromosomes 4 and 4A, but the remaining outlier regions show more  
208 complicated signals (Figures S13-14).

209       Where  $F_{ST}$  is highest on Chromosome 2, we find strong evidence of both  
210 purifying and balancing selection in all three populations (Figure 3C). We find that  
211 nucleotide diversity is very low within every population, and immediately after the block  
212 of elevated  $F_{ST}$ , we see a sharp increase in nucleotide diversity in all three populations  
213 (Figure 3C). In addition, Tajima's  $D$  tracks these changes in diversity: where  $F_{ST}$  and  $\pi$   
214 are low, Tajima's  $D$  is also negative in all three populations—indicating an excess of  
215 low-frequency variants and perhaps purifying selection—but this statistic climbs to high  
216 positive values immediately before and after the block of elevated  $F_{ST}$ , indicating

217 balancing selection. The concordance of Tajima's  $D$  in all three populations suggests a  
218 release of some kind, whether it is a relaxation of purifying selection or a recombination  
219 breakpoint. Even though the centromere is predicted to be 30-Mb downstream of this  
220 region, these signatures are consistent with linkage disequilibrium in this 4-Mb region:  
221 eukaryotes generally show suppression of recombination near the centromere, leading  
222 to a build-up of linkage disequilibrium if this suppression extends for 30-Mb. It is  
223 possible that a structural variant in the founding population could generate this pattern.  
224 However, we note that  $F_{ST}$  among AU and the other populations in fact declines  
225 dramatically (to around 0.1) in the middle of the 4Mb region, and in the same location,  
226  $F_{ST}$  between NA and UK increases slightly. If this genomic region differentiated as a  
227 large linkage block, we would not expect such a decline in  $F_{ST}$  and a weakening of  
228 selective pressure (as evidenced by the increase in Tajima's  $D$ ). For these reasons, we  
229 suggest that the peak on Chromosome 2 indicates both purifying and balancing  
230 selection in the AU invasion.

231

232 **One region on Chromosome 6 reveals how population expansion could interact**  
233 **with selection**

234 Both invasions have differentiated from the native range in a 4-Mb region of  
235 Chromosome 6 (Figure 3). As a preliminary check, we note that the large distance  
236 between this  $F_{ST}$  peak and the centromere suggests that low recombination is unlikely to  
237 explain differentiation. We suggest that the clearest explanation of this peak invokes  
238 selection on previously rare variants, based on three lines of evidence.

239 First, we suggest that rapid population expansion allowed previously rare  
240 variants to surf to a higher allele frequency in the invasions. In this 4-Mb region,  
241 invasive diversity ( $\pi_{AU}$  and  $\pi_{NA}$ ) are each more than three times the native diversity. This  
242 shift in within-population diversity is not random; in fact, when we examine invasive  
243 nucleotide diversity directly under the  $F_{ST}$  peak, we find only three other windows ~4.2-  
244 Mb upstream of this peak show invasive diversity that is notably higher than native  
245 diversity. This evidence supports the hypothesis that upon establishment, starlings  
246 experienced either (1) balancing selection (strong positive Tajima's  $D$ ) in both invasions  
247 due to novel selective pressures or (2) a release of purifying selection that led to an  
248 accumulation of variants and thus higher invasive diversity—but only in this specific  
249 region. These patterns could be driven by a small number of individuals, or they could  
250 indicate a population-wide shift, which leads us to our next point.

251 Second, in this region, we find that these higher-diversity alleles in both the NA  
252 and AU populations have increased in frequency relative to the native range. In the  
253 same region, we find strong positive values of Tajima's  $D$  in the invasions—indicating a  
254 moderate-to-high frequency of the alternative allele—and negative Tajima's  $D$  in the UK  
255 population at this peak, since these signatures suggest that previously rare variants  
256 have increased in frequency in the invasions only. Alternatively—or simultaneously—  
257 purifying selection may have driven these same variants to a lower frequency in the UK  
258 population. The most parsimonious explanation of these shifts in diversity is a single  
259 event in the UK population, but we note that this shift is specific to only a small region of  
260 the genome.



261 Third, and most importantly, these patterns are found in this region of the  
262 genome only, and it is notable that this shift in diversity co-occurs with one of the  
263 highest  $F_{ST}$  peaks. We would expect to see similarly high invasive diversity under other  
264  $F_{ST}$  peaks if population expansion alone could explain these patterns. However,  
265 nowhere else in the genome do we find such high invasive diversity where native  
266 diversity is low. We suggest a selective explanation given that a genetic bottleneck is  
267 not likely to produce this pattern. Taken together, these results provide evidence that  
268 rapid expansion of these starling invasions may have facilitated selection to drive  
269 previously rare variants higher in frequency, independently in both NA and AU  
270 populations.

271

### 272 **Genes under putative selection may aid in invasion success**

273 The region under putative selection on Chromosome 6 overlaps with the coding regions  
274 of four genes with dramatically different functions (*JMJD1C*, *RTKN2*, *NRBF2*, and  
275 *ARID5B*), and we suggest that selection on one of these genes might explain the  
276 differentiation in the region, with the other genes remaining in linkage disequilibrium with  
277 the possible candidate. Among these candidates, we can speculate that *ARID5B* has  
278 the most intuitive link to hypothesized selective pressures: this protein is required for  
279 adipogenesis and involved in smooth muscle differentiation. The first exon of this gene  
280 lies directly under the  $F_{ST}$  peak between AU and UK starlings, and muscle growth and  
281 fat storage may have been key to dispersal ability. The three other genes that overlap  
282 this window are involved in the DNA-damage response (*JMJD1C*), lymphopoiesis  
283 (*RTKN2*), and regulating autophagy (*NRBF2*). For details on GO term enrichment in

284 these outlier regions, see SI Section 6. Regardless of the mechanism driving these loci  
285 toward an intermediate frequency, it remains possible that variation at one or more of  
286 these loci influenced invasion success by maintaining heterozygosity.

287

## 288 **Conclusion**

289 An open question in invasion biology is whether an invasive population's success  
290 is better attributed to intrinsic properties of the invasive species or to extrinsic factors  
291 specific to the novel environment. These results demonstrate how demographic shifts  
292 during and immediately after any establishment may support a species' success and  
293 even lead to local adaptation to environmental conditions. The Australian and North  
294 American starling invasions colonized each continent around the same time, and  
295 experienced similar contractions in population size that led to classical founder events  
296 upon establishment. The shared decline in genetic diversity represents a shared  
297 intrinsic determinant of invasion success. However, differences in propagule pressure  
298 and dispersal likely influence the evolutionary trajectory of each population <sup>37,38</sup>.  
299 Propagule pressure (also termed introduction effort) is a composite measure of the  
300 number of individuals released, and we note that founding population sizes may have  
301 varied slightly among AU and NA introductions. Even without dramatic variation in  
302 founding population sizes, dispersal itself shapes genetic diversity and thus adaptive  
303 potential, as shown in a recent study of invasive plants <sup>39</sup>. Starlings' dispersal and  
304 migration varies among populations: starlings in Australia tend to migrate less frequently  
305 and across shorter distances, but starlings migrate and/or disperse hundreds of  
306 kilometers in North America <sup>19,40</sup> and South Africa<sup>41</sup>.

307 It is remarkable that despite this contrast in life history strategies and the  
308 stochastic nature of evolution during range expansion, we find  $F_{ST}$  peaks shared among  
309 invasions at only a few regions of the starling genome. Although these  $F_{ST}$  peaks could  
310 arise via drift, footprints of other population genetic metrics are consistent with selection.  
311 We note that mutations in specific chromosomal regions could also be accelerated by  
312 extrinsic environmental properties (climate, food availability, and more) through  
313 epigenetic CpG DNA hypermethylation events, which are known to increase frequency  
314 of genetic mutations by spontaneous deamination CG>TG transition<sup>42-44</sup>. For example,  
315 such epigenetic shifts supported the invasion of another avian species (the house  
316 sparrow) into Australia<sup>45</sup>. Regardless of genetic mechanism, we suggest that  
317 differentiation in these genetic regions is simultaneously shaped by intrinsic and  
318 extrinsic drivers of invasion success. We find it notable that some differentiated regions  
319 (in particular, Chromosome 6) are shared among invasions despite differences in the  
320 selective environment as well as stochastic processes that shape the starling's  
321 evolution on each continent. The European starling invasions compared here suggest  
322 that rapid population growth may support local adaptation.

323

## 324 **Methods**

### 325 *Whole-genome re-sequencing*

326 Libraries for each individual starling were constructed using a TruSeq DNA PCR-  
327 free High Throughput Library Prep Kit (Illumina, San Diego, CA). All individuals passed  
328 the initial quality check with FASTQC (Babraham Bioinformatics, Cambridge, UK).  
329 Adapters were removed using AdapterRemoval<sup>46</sup> and reads mapped to the reference S.

330 *vulgaris* vNA genome (GCF\_001447265.1)<sup>47</sup> genome using BOWTIE2<sup>48</sup> and checked for  
331 mapping quality using qualimap<sup>49</sup>. Sequencing quality was relatively high: 96.4% of  
332 reads mapped to the *S. vulgaris* genome with a coverage of 18.4X and a mapping  
333 quality of 26.9 (Table S1). Reads were also mapped to a pseudo-chromosome-level *S.*  
334 *vulgaris* vNA genome, where scaffolds were assigned to chromosomes based on  
335 orthology to the zebra finch reference genome (GCF\_000151805.1)<sup>50</sup>. Assuming  
336 orthology, we were able to predict centromere positions based on the known genomic  
337 architecture of the zebra finch<sup>51</sup>, but this study does not directly define centromere  
338 position.

339 We called variants using GATK's HaplotypeCaller in GVCF mode and flagged  
340 low-quality variants using GATK Best Practices (QD<2, FS>60, MQ<40, and SOR>3,  
341 accessed March 21, 2018<sup>52</sup>). We filtered sites for missing data, depth, and quality using  
342 vcfTools (parameters: --max-missing 0.8 --min-meanDP 2 --max-meanDP 50 --remove-  
343 filtered-all), which removed 4.1 million sites from the original SNP set and left a total of  
344 23.4 million sites for downstream analyses. Starting from the mapped reads used in the  
345 GATK pipeline, we also called SNPs based on a minimum p-value of the correct  
346 genotype probability at each site using ANGSD<sup>34,53</sup>. Filtering for SNP p-value (0.0001),  
347 depth (between 60 and 400 sequences), and mapping quality (>20) left 16,151,007  
348 sites. All scripts used in read processing and filtering are available on GitHub:  
349 <https://github.com/nathofme/global-RESEQ>.

350

351 *Population structure*

352 Population structure analyses used a dataset of biallelic SNPs in Hardy-  
353 Weinberg Equilibrium, where minor allele count (MAC) is  $> 2$  and SNPs were pruned for  
354 LD by removing all sites with an  $r^2 > 0.6$  within 1kb sliding windows. This filtering left  
355 868,685 sites. Since some individuals showed much lower coverage (minimum 5.58X),  
356 all tests of population structure were run with both variant-called (GATK) and genotype  
357 probability (ANGSD) datasets. Scripts for variant-called analyses are stored at  
358 <https://github.com/nathofme/global-RESEQ/blob/master/filter-scan.sh>, and scripts for  
359 probability-based analyses at [https://github.com/nathofme/global-](https://github.com/nathofme/global-RESEQ/blob/master/angsd.sh)  
360 [RESEQ/blob/master/angsd.sh](https://github.com/nathofme/global-RESEQ/blob/master/angsd.sh).

361 We estimated variance among and between individuals using a principal  
362 components analysis in SNPRELATE<sup>54</sup> (GATK) and a covariance matrix built in  
363 ngsTools<sup>55</sup> (ANGSD). We used ADMIXTURE<sup>56</sup> (GATK) and NGSADMIX<sup>57</sup> (ANGSD) to  
364 examine shared ancestry among individuals, and we also measured pairwise genetic  
365 distances using ngsDist for the ANGSD dataset only.

366

### 367 *Demographic inference*

368 We used FASTSIMCOAL2<sup>35</sup> to explicitly test for genetic bottlenecks in each population.  
369 FASTSIMCOAL2 takes a site-frequency spectrum (SFS) as input, and we used the SFS  
370 estimated from ANGSD given that likelihood-based estimates are more robust to  
371 sequencing error<sup>58</sup>. Demographic models in *fastsimcoal2* used priors on the time (TBOT  
372 = 10 to 300) and size of the bottleneck (NBOT = 10 to 1000). The command line  
373 arguments were as follows: -M -n 1000000 -L 50 -q -k 100000. Each run began with a  
374 randomly generated seed (-r), and the -k flag simply writes polymorphic sites to a

375 temporary file to cope with the high memory usage of this analysis. Scripts for  
376 demographic analyses can be found at <https://github.com/nathofme/global-RESEQ/blob/master/demography.sh>.

378 To verify this demographic model, we also estimate inbreeding coefficients (F-  
379 statistics) using the `-het` command in VCFTOOLS, and calculate relatedness among each  
380 pair of individuals using the `-relatedness` method of Yang et al. (2010) in VCFTOOLS.

381

### 382 *Sliding window scans*

383 For scans of genetic divergence and diversity, we used a variant dataset filtered only for  
384 depth and quality: we kept variants that had less than 20% missing data across all sites,  
385 but did not apply minor allele frequency (MAF) filters, filter for HWE, linkage, or any  
386 other factors. Given that rare alleles likely provide the strongest evolutionary signals in  
387 this system, we did not want to filter out any alleles that might have been rare in one  
388 population (e.g., the native UK population) and increased in frequency in another  
389 population (e.g., the AU or USA invasions). Nevertheless, we test for sensitivity to this  
390 filtering choice in SI Section 2B.

391 We calculated  $F_{ST}$  and nucleotide diversity ( $\pi$ ) using overlapping 50-kb sliding  
392 windows with a step size of 10kb using VCFTOOLS<sup>59</sup>. We calculate nucleotide diversity  
393 separately for each population. We then calculate  $d_{xy}$  using a Python script by Simon  
394 Martin (accessed at  
395 [https://github.com/simonhmartin/genomics\\_general/blob/master/popgenWindows.py](https://github.com/simonhmartin/genomics_general/blob/master/popgenWindows.py) on  
396 February 12, 2020). This analysis includes all confident variant calls (parameters: --  
397 output-mode EMIT\_ALL\_CONFIDENT\_SITES in GATK's HaplotypeCaller); only with

398 this modification do we recover levels of  $d_{xy}$  similar to other systems. We also measured  
399  $F_{ST}$  and  $\pi$  in overlapping 10-kb windows to localize elevated  $F_{ST}$  to an even smaller  
400 region of the genome. To visualize relationships between diversity metrics, we plotted  
401 the mean values of each metric in a 50-kb window. All scripts for plotting are stored on  
402 GitHub: <https://github.com/nathofme/global-RESEQ/>.

403

#### 404 *Identifying candidate genes under selection*

405 In contrast to identifying single genes, network analyses of gene ontology (GO) terms  
406 can provide a more holistic and objective method of identifying shared functions.  
407 Network analyses can also provide more statistical power, correcting for the usual  
408 problem of multiple testing. To identify functions of candidate regions, we quantified the  
409 uniqueness and dispensability of each GO term using a method that quantifies semantic  
410 similarity<sup>60</sup>. This analysis by default emphasizes GO terms that are rare in the list of  
411 candidates provided; because we are interested in functions that are common across  
412 outlier regions, we manually curate category labels to choose GO terms that are less  
413 unique and more dispensable as representative titles.

414

#### 415 **Acknowledgments**

416 SLM acknowledges Roslin Institute Strategic Grant funding from the UK Biotechnology  
417 and Biological Sciences Research Council (BB/P013759/1). HR acknowledges that  
418 sequencing costs were supported by a fellowship from The Winston Churchill Memorial  
419 Trust, and a Phyllis and Eileen Gibbs Fellowship from Newnham College, Cambridge.  
420 LAR was supported by a Scientia Fellowship from UNSW. This project was also

421 supported by discussions at Bird Sense meetings funded by the Royal Society of  
422 London, the Association for the Study of Animal Behaviour, and the Zoological Society  
423 of London. NRH acknowledges bioinformatic support from members of the Fuller  
424 Evolutionary Biology Program at the Cornell Lab of Ornithology, including Irby Lovette,  
425 Jennifer Walsh, and Leonardo Campagna.

426

427

## 428 **Author Contributions**

429 Project conception: all authors

430 Field work: Melissa Bateson, Lee Ann Rollins, Adam Cardilini, Scott J Werner

431 Lab work: Wes Warren and the McDonnell Group at WUSTL.

432 Data analysis and manuscript writing: Natalie R Hofmeister, Katarina Stuart

433 Manuscript editing: all authors

434

## 435 **References**

- 436 1. Russell, J. C. & Blackburn, T. M. The Rise of Invasive Species Denialism. *Trends*  
437 *in Ecology & Evolution* **32**, 3–6 (2017).
- 438 2. Ricciardi, A. & Ryan, R. The exponential growth of invasive species denialism.  
439 *Biological Invasions* **20**, 549–553 (2017).
- 440 3. Sagoff, M. Fact and value in invasion biology. *Conservation Biology* **34**, 581–588  
441 (2019).
- 442 4. Davis, M. A. Let's welcome a variety of voices to invasion biology. *Conservation*  
443 *Biology* [cobi.13608–6](https://doi.org/10.1111/cobi.13608) (2020). doi:10.1111/cobi.13608
- 444 5. Lowe, W. H., Kovach, R. P. & Allendorf, F. W. Population Genetics and  
445 Demography Unite Ecology and Evolution. *Trends in Ecology & Evolution* **32**,  
446 141–152 (2017).
- 447 6. Kolbe, J. J. *et al.* Genetic variation increases during biological invasion by a  
448 Cuban lizard. *Nature* **431**, 177–181 (2004).
- 449 7. Dlugosch, K. M. & Parker, I. M. Founding events in species invasions: genetic  
450 variation, adaptive evolution, and the role of multiple introductions. *Mol Ecol* **17**,  
451 431–449 (2008).



- 452 8. Marques, D. A., Jones, F. C., Di Palma, F., Kingsley, D. M. & Reimchen, T. E.  
453 Experimental evidence for rapid genomic adaptation to a new niche in an adaptive  
454 radiation. *Nat. ecol. evol.* 1–14 (2018). doi:10.1038/s41559-018-0581-8
- 455 9. Gralka, M. *et al.* Allele surfing promotes microbial adaptation from standing  
456 variation. *Ecology Letters* **19**, 889–898 (2016).
- 457 10. White, T. A., Perkins, S. E., Heckel, G. & Searle, J. B. Adaptive evolution during  
458 an ongoing range expansion: the invasive bank vole (*Myodes glareolus*) in  
459 Ireland. *Mol Ecol* **22**, 2971–2985 (2013).
- 460 11. Tsutsui, N. D., Suarez, A. V., Holway, D. A. & Case, T. J. Reduced genetic  
461 variation and the success of an invasive species. *Proc Natl Acad Sci USA* **97**,  
462 5948–5953 (2000).
- 463 12. Verhoeven, K. J. F., Macel, M., Wolfe, L. M. & Biere, A. Population admixture,  
464 biological invasions and the balance between local adaptation and inbreeding  
465 depression. *Proceedings of the Royal Society B: Biological Sciences* **278**, 2–8  
466 (2011).
- 467 13. Willoughby, J. R., Harder, A. M., Tennessen, J. A., Scribner, K. T. & Christie, M.  
468 R. Rapid genetic adaptation to a novel environment despite a genome-wide  
469 reduction in genetic diversity. *Mol Ecol* **17**, 675 (2018).
- 470 14. Dlugosch, K. M., Anderson, S. R., Braasch, J., Cang, F. A. & Gillette, H. D. The  
471 devil is in the details: genetic variation in introduced populations and its  
472 contributions to invasion. *Mol Ecol* **24**, 2095–2111 (2015).
- 473 15. Lu-Irving, P., Marx, H. E. & Dlugosch, K. M. ScienceDirect Leveraging  
474 contemporary species introductions to test phylogenetic hypotheses of trait  
475 evolution. *Current Opinion in Plant Biology* **42**, 95–102 (2018).
- 476 16. Bock, D. G., Kantar, M. B., Caseys, C., Matthey-Doret, R. & Rieseberg, L. H.  
477 Evolution of invasiveness by genetic accommodation. *Nat. ecol. evol.* **2**, 991–999  
478 (2018).
- 479 17. Linz, G. M., Homan, H. J., Gaulker, S. M., Penry, L. B. & Bleier, W. J. *European*  
480 *starlings: a review of an invasive species with far-reaching impacts. Managing*  
481 *Vertebrate Invasive Species* 24 (2007).
- 482 18. Forbush, E. H. *The Starling*. (Wright and Potter Printing Co., 1915).
- 483 19. Kessel, B. Distribution and migration of the European Starling in North America.  
484 *The Condor* **55**, 49–67 (1953).
- 485 20. Rollins, L. A., Woolnough, A. P., Wilton, A. N., Sinclair, R. & Sherwin, W. B.  
486 Invasive species can't cover their tracks: using microsatellites to assist  
487 management of starling (*Sturnus vulgaris*) populations in Western Australia. *Mol*  
488 *Ecol* **18**, 1560–1573 (2009).
- 489 21. Feare, C. *The Starling*. (Oxford University Press, 1984).
- 490 22. Stuart, K. C. *et al.* Signatures of selection in a recent invasion reveals adaptive  
491 divergence in a highly vagile invasive species. *Mol Ecol* (2020).  
492 doi:10.1101/mec.15601
- 493 23. Cardilini, A. P. A., Buchanan, K. L., Sherman, C. D. H., Cassey, P. & Symonds,  
494 M. R. E. Tests of ecogeographical relationships in a non-native species: what  
495 rules avian morphology? *Oecologia* **181**, 783–793 (2016).
- 496 24. Cardilini, A. P. A. *et al.* Environmental Influences on Neuromorphology in the Non-  
497 Native Starling *Sturnus vulgaris*. *Brain Behav Evol* **92**, 63–70 (2018).

- 498 25. Bodt, L. H., Rollins, L. A. & Zichello, J. M. Contrasting mitochondrial diversity of  
499 European starlings (*Sturnus vulgaris*) across three invasive continental  
500 distributions. *Ecol Evol* **10**, 10186–10195 (2020).
- 501 26. Hofmeister, N. R., Werner, S. J. & Lovette, I. J. Environmental correlates of  
502 genetic variation in the invasive European starling in North America. *Mol Ecol*  
503 *mec.15806–33* (2021). doi:10.1111/mec.15806
- 504 27. Dolbeer, R. A. Migration patterns of age and sex classes of Blackbirds and  
505 Starlings. *Journal of Field Ornithology* **53**, 28–46
- 506 28. Werner, S. J., Fischer, J. W. & Hobson, K. A. Multi-isotopic ( $\delta^2\text{H}$ ,  $\delta^{13}\text{C}$ ,  $\delta^{15}\text{N}$ )  
507 tracing of molt origin for European starlings associated with U.S. dairies and  
508 feedlots. *PLoS ONE* **15**, e0237137 (2020).
- 509 29. Ball, G. F. & Wingfield, J. C. Changes in plasma levels of luteinizing hormone and  
510 sex steroid hormones in relation to multiple-broodedness and nest-site density in  
511 male starlings. *Physiological Zoology* **60**, 191–199 (1987).
- 512 30. Dawson, A. Plasma gonadal steroid levels in wild starlings (*Sturnus vulgaris*)  
513 during the annual cycle and in relation to the stages of breeding. *General and*  
514 *Comparative Endocrinology* **49**, 286–294
- 515 31. Briski, E. *et al.* Beyond propagule pressure: importance of selection during the  
516 transport stage of biological invasions. *Frontiers in Ecology and the Environment*  
517 **16**, 345–353 (2018).
- 518 32. Irwin, D. E. *et al.* A comparison of genomic islands of differentiation across three  
519 young avian species pairs. *Mol Ecol* **511**, 83–17 (2018).
- 520 33. Hofmeister, N. R., Werner, S. J. & Lovette, I. J. Environment but not geography  
521 explains genetic variation in the invasive and largely panmictic European starling  
522 in North America. **295**, 254–32 (2019).
- 523 34. Korneliussen, T. S., Albrechtsen, A. & Nielsen, R. ANGSD: Analysis of Next  
524 Generation Sequencing Data. *BMC Bioinformatics* **15**, 356 (2014).
- 525 35. Excoffier, L., Dupanloup, I., Huerta-Sanchez, E., Sousa, V. C. & Foll, M. Robust  
526 Demographic Inference from Genomic and SNP Data. *PLoS Genet* **9**, e1003905–  
527 17 (2013).
- 528 36. Cruickshank, T. E. & Hahn, M. W. Reanalysis suggests that genomic islands of  
529 speciation are due to reduced diversity, not reduced gene flow. *Mol Ecol* **23**,  
530 3133–3157 (2014).
- 531 37. Simberloff, D. The Role of Propagule Pressure in Biological Invasions. *Annu. Rev.*  
532 *Ecol. Evol. Syst.* **40**, 81–102 (2009).
- 533 38. Williams, J. L., Hufbauer, R. A. & Miller, T. E. X. How Evolution Modifies the  
534 Variability of Range Expansion. *Trends in Ecology & Evolution* 1–11 (2019).  
535 doi:10.1016/j.tree.2019.05.012
- 536 39. Smith, A. L. *et al.* Global gene flow releases invasive plants from environmental  
537 constraints on genetic diversity. *Proc Natl Acad Sci USA* **117**, 4218–4227 (2020).
- 538 40. Burt, H. E. & Giltz, M. L. Seasonal directional patterns of movements and  
539 migrations of starlings. *Bird-Banding* **48**, 259–271 (1977).
- 540 41. Berthouly-Salazar, C. *et al.* Long-distance dispersal maximizes evolutionary  
541 potential during rapid geographic range expansion. *Mol Ecol* **22**, 5793–5804  
542 (2013).

- 543 42. Sved, J. & Bird, A. The expected equilibrium of the CpG dinucleotide in vertebrate  
544 genomes under a mutation model. *Proc Natl Acad Sci USA* **87**, 4692–4696  
545 (1990).
- 546 43. Saxonov, S., Berg, P. & Brutlag, D. L. A genome-wide analysis of CpG  
547 dinucleotides in the human genome distinguishes two distinct classes of  
548 promoters. *Proc Natl Acad Sci USA* **103**, 1412–1417 (2006).
- 549 44. Simmen, M. Genome-scale relationships between cytosine methylation and  
550 dinucleotide abundances in animals. *Genomics* **92**, 33–40
- 551 45. Sheldon, E. L., Schrey, A., Andrew, S. C., Ragsdale, A. & Griffith, S. C.  
552 Epigenetic and genetic variation among three separate introductions of the house  
553 sparrow (*Passer domesticus*) into Australia. *Royal Society Open Science* **5**,  
554 172185 (2018).
- 555 46. Schubert, M., Lindgreen, S. & Orlando, L. AdapterRemoval v2: rapid adapter  
556 trimming, identification, and read merging. *BMC Research Notes* 1–7 (2016).  
557 doi:10.1186/s13104-016-1900-2
- 558 47. Stuart, K. C. *et al.* Transcript- and annotation-guided genome assembly of the  
559 European starling. *bioRxiv* (2021). doi:10.1101/2021.04.07.438753
- 560 48. Langmead, B. & Salzberg, S. L. Fast gapped-read alignment with Bowtie 2. *Nat*  
561 *Methods* **9**, 357–359 (2012).
- 562 49. Okonechnikov, K., Conesa, A. & García-Alcalde, F. Qualimap 2: advanced multi-  
563 sample quality control for high-throughput sequencing data. *Bioinformatics*  
564 *btv566*–10 (2015). doi:10.1093/bioinformatics/btv566
- 565 50. Grabherr, M. G. *et al.* Genome-wide synteny through highly sensitive sequence  
566 alignment: Satsuma. *Bioinformatics* **26**, 1145–1151 (2010).
- 567 51. Knief, U. & Forstmeier, W. Mapping centromeres of microchromosomes in the  
568 zebra finch (*Taeniopygia guttata*) using half-tetrad analysis. *Chromosoma* 1–12  
569 (2016). doi:10.1007/s00412-015-0560-7
- 570 52. McKenna, A. *et al.* The Genome Analysis Toolkit: A MapReduce framework for  
571 analyzing next-generation DNA sequencing data. *Genome Research* **20**, 1297–  
572 1303 (2010).
- 573 53. Kim, S. Y. *et al.* Estimation of allele frequency and association mapping using  
574 next-generation sequencing data. *BMC Bioinformatics* **12**, 231 (2011).
- 575 54. Zheng, X. *et al.* A high-performance computing toolset for relatedness and  
576 principal component analysis of SNP data. *Bioinformatics* **28**, 3326–3328 (2012).
- 577 55. Fumagalli, M., Vieira, F. G., Linderroth, T. & Nielsen, R. ngsTools: methods for  
578 population genetics analyses from next-generation sequencing data.  
579 *Bioinformatics* **30**, 1486–1487 (2014).
- 580 56. Alexander, D. H. & Lange, K. Enhancements to the ADMIXTURE algorithm for  
581 individual ancestry estimation. *BMC Bioinformatics* **12**, 1–6 (2011).
- 582 57. Skotte, L., Korneliussen, T. S. & Albrechtsen, A. Estimating Individual Admixture  
583 Proportions from Next Generation Sequencing Data. *Genetics* **195**, 693–702  
584 (2013).
- 585 58. Nielsen, R., Korneliussen, T., Albrechtsen, A., Li, Y. & Wang, J. SNP Calling,  
586 Genotype Calling, and Sample Allele Frequency Estimation from New-Generation  
587 Sequencing Data. *PLoS ONE* **7**, e37558–11 (2012).

- 588 59. Danecek, P. *et al.* The variant call format and VCFtools. *Bioinformatics* **27**, 2156–  
589 2158 (2011).
- 590 60. Supek, F., Bosnjak, M., Skunca, N. & Smuc, T. REVIGO Summarizes and  
591 Visualizes Long Lists of Gene Ontology Terms. *PLoS ONE* **6**, e21800 (2011).  
592
